# Supplementary material
Source: MDPI journal article supplement (https://www.mdpi.com/2073-4344/9/9/720)
Supplement: s1 [file s1]

# Supporting Information

## In situ encapsulated Pt nanoparticles dispersed in low temperature oxygen for partial oxidation of methane to syngas

Junwen Wang<sup>1\*</sup>, Lichao Ma<sup>1</sup>, Chuanmin Ding<sup>1\*</sup>, Yannan Xue<sup>1</sup>, Yongkang Zhang<sup>1</sup> and Zhiting Gao<sup>1</sup>

1. College of Chemistry & Chemical Engineering, Taiyuan University of Technology, Taiyuan 030024, PR China

\* Correspondence: Corresponding authors at: College of Chemistry & Chemical Engineering, Taiyuan University of Technology, Taiyuan 030024, PR China. Tel.: +86 0351 6014 498; Fax: +86 0351 6014 498. E-mail addresses: wangjunwen@tyut.edu.cn (J. Wang), dingchuanmin@163.com

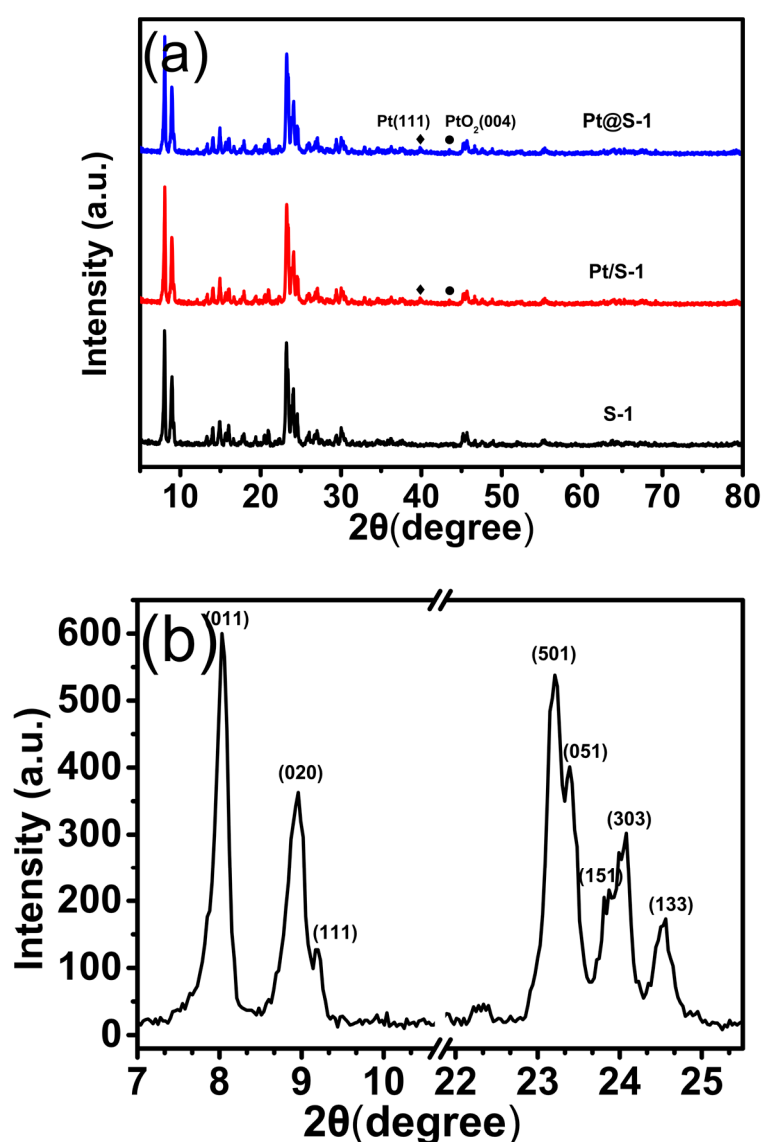

**Figure S1.** XRD patterns of the as -prepared samples (a), XRD partial enlargement of S-1 zeolite (b).

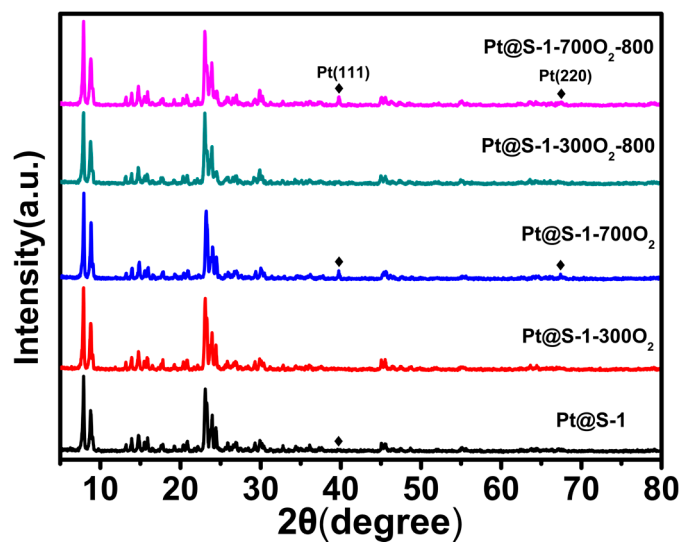

**Figure S2.** XRD patterns of the Pt@S-1 catalyst after oxygen calcination and reaction at different temperatures.

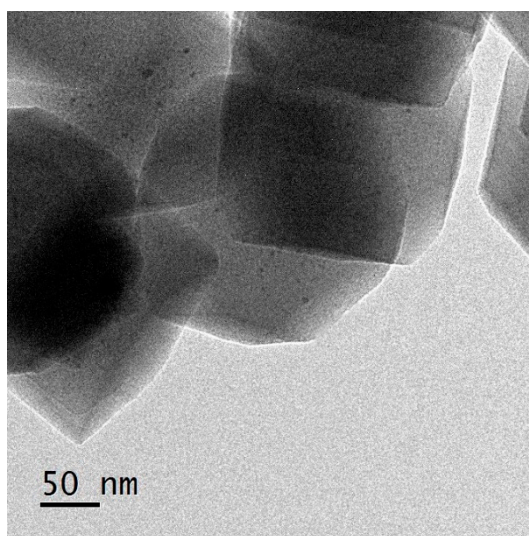

**Figure S3.** TEM images of the fresh Pt@S-1 catalyst.

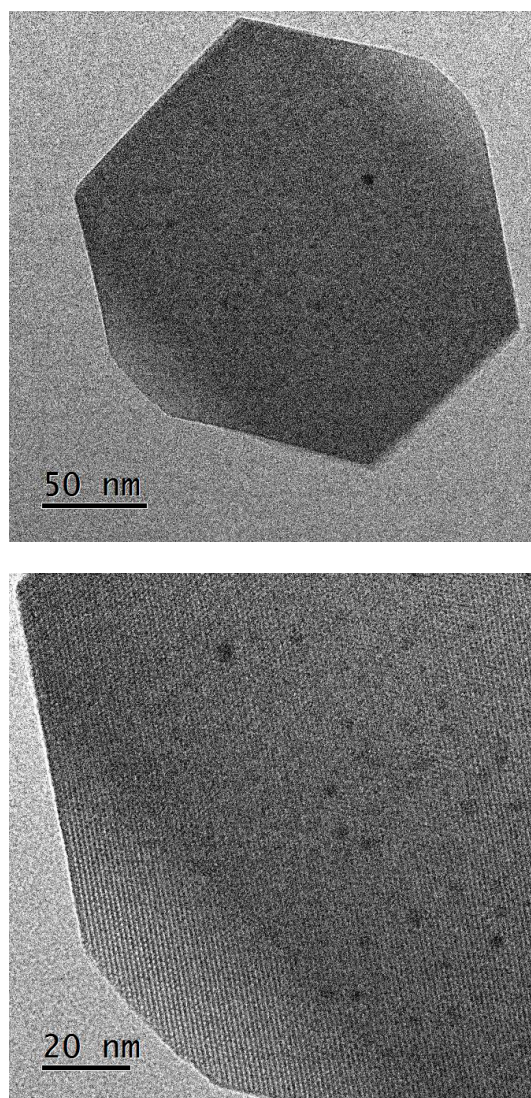

**Figure S4.** TEM images of the oxygen calcinated Pt@S-1-300O<sub>2</sub> catalyst.

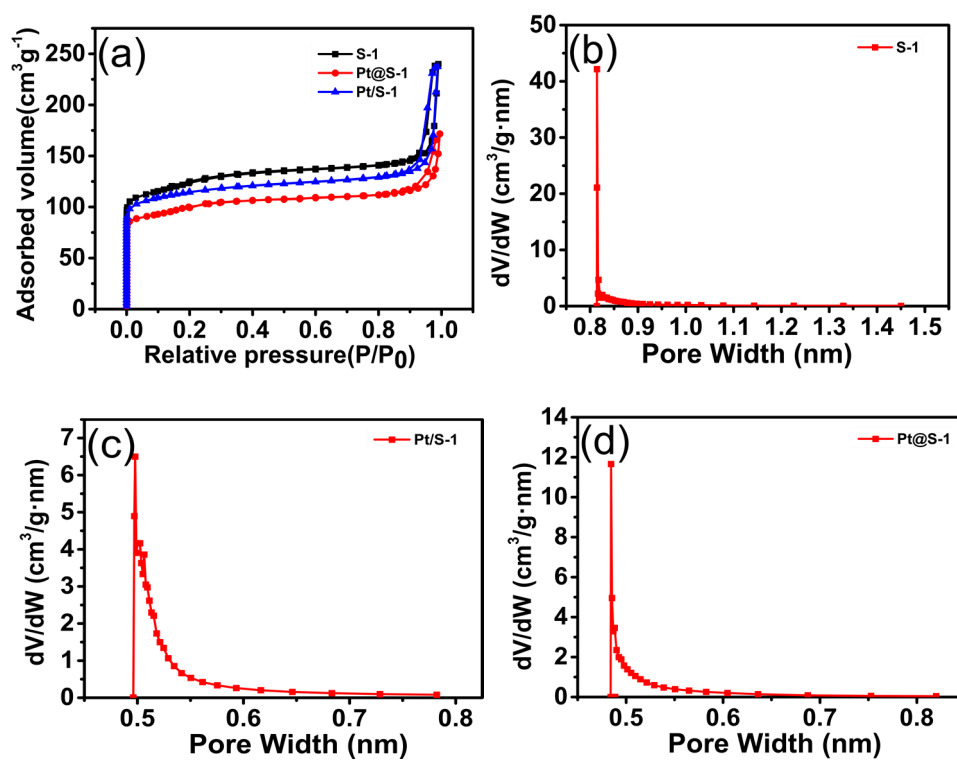

**Figure S5.**  $\text{N}_2$  adsorption-desorption isotherms (a) and pore size distribution (b-d) of as-prepared samples.
